# Supplementary material for: Design and synthesis of novel bis-annulated caged polycycles via ring-closing metathesis: pushpakenediol
Source: publisher site journal article supplement (doi:10.3762/bjoc.10.280), 2014-11-13

## Supporting Information

for

### Design and synthesis of novel bis-annulated caged polycycles via ring-closing metathesis: pushpakenediol

Sambasivarao Kotha\* and Mirtunjay Kumar Dipak

Address: Department of Chemistry, Indian Institute of Technology-Bombay, Powai, India,

Fax: 022-2572 7152

Email: Sambasivarao Kotha - [srk@chem.iitb.ac.in](mailto:srk@chem.iitb.ac.in)

\*Corresponding author

### Copies of $^1\text{H}$ , $^{13}\text{C}$ NMR and HRMS spectra for all new compounds

#### Table of contents

|                                                                       |    |
|-----------------------------------------------------------------------|----|
| 1. $^1\text{H}$ and $^{13}\text{C}$ NMR spectra of compound <b>19</b> | S2 |
| 2. $^1\text{H}$ and $^{13}\text{C}$ NMR spectra of compound <b>20</b> | S3 |
| 3. $^1\text{H}$ and $^{13}\text{C}$ NMR spectra of compound <b>21</b> | S4 |
| 4. $^1\text{H}$ and $^{13}\text{C}$ NMR spectra of compound <b>22</b> | S5 |
| 5. $^1\text{H}$ and $^{13}\text{C}$ NMR spectra of compound <b>24</b> | S6 |
| 6. $^1\text{H}$ and $^{13}\text{C}$ NMR spectra of compound <b>26</b> | S7 |

# 1. <sup>1</sup>H and <sup>13</sup>C NMR spectra of compound 19

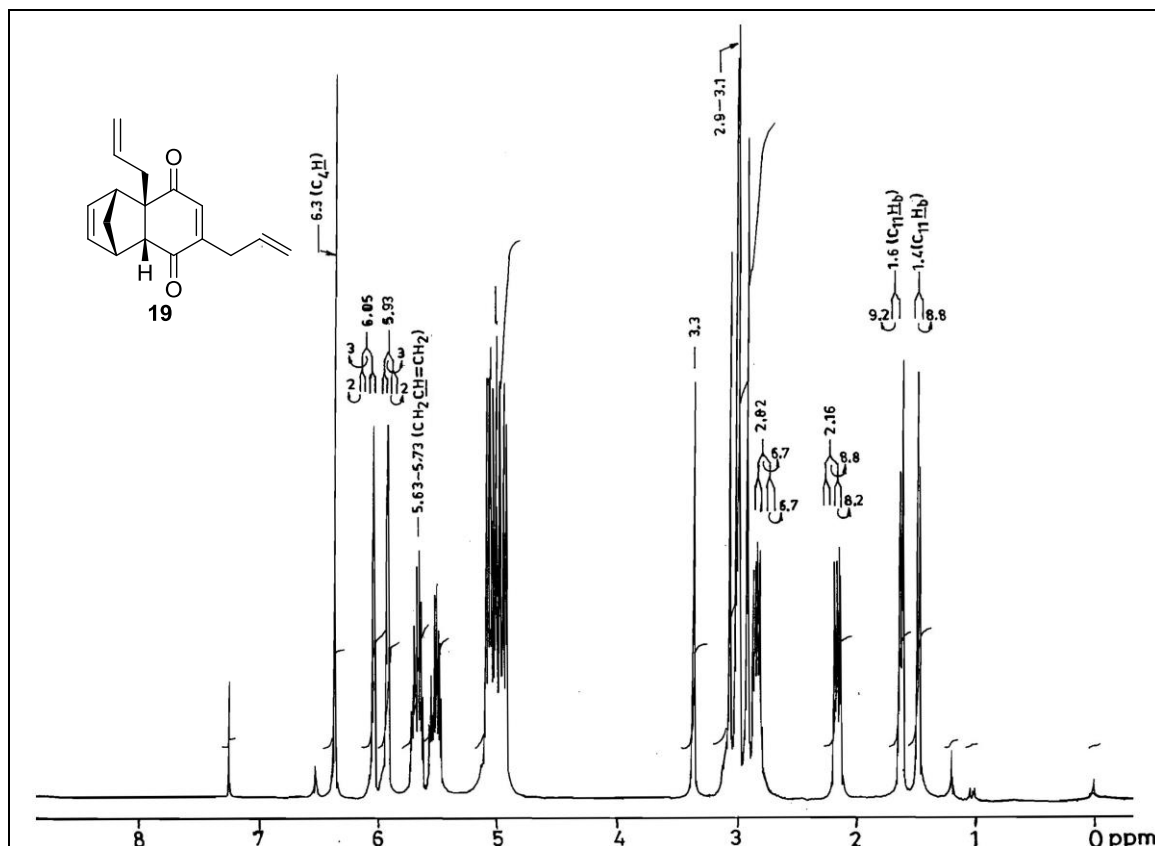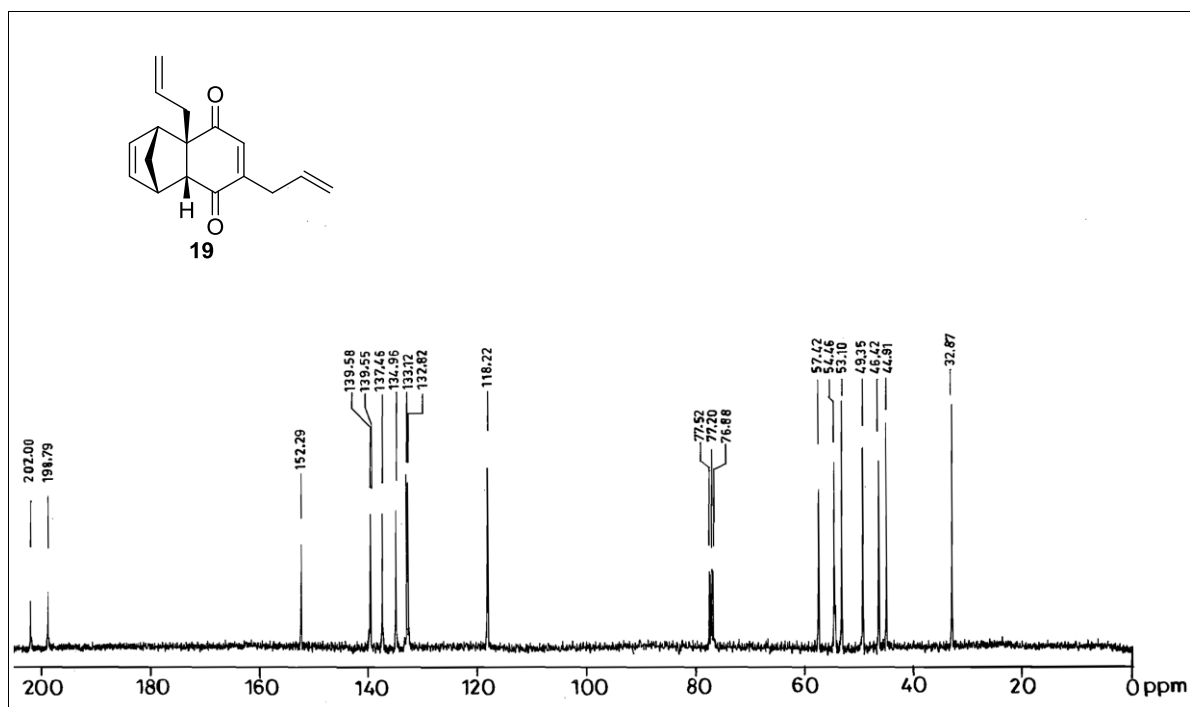

## 2. $^1\text{H}$ and $^{13}\text{C}$ NMR spectra of compound 20

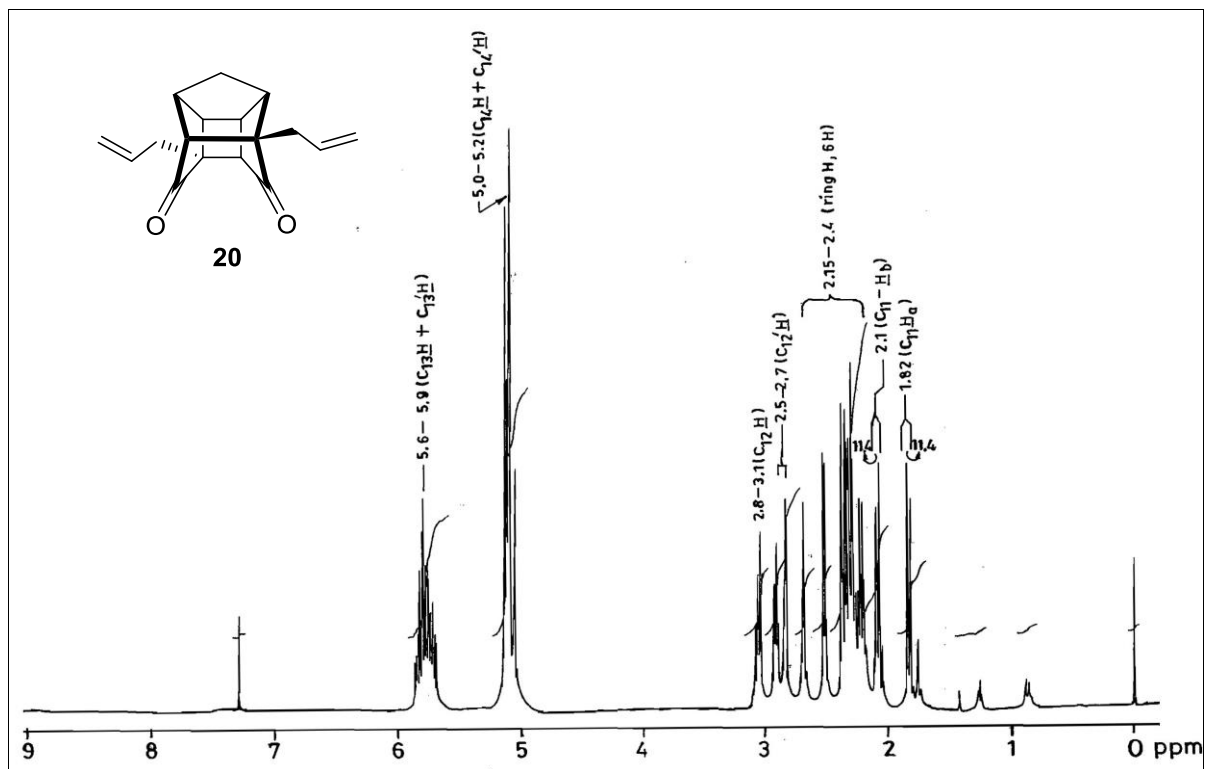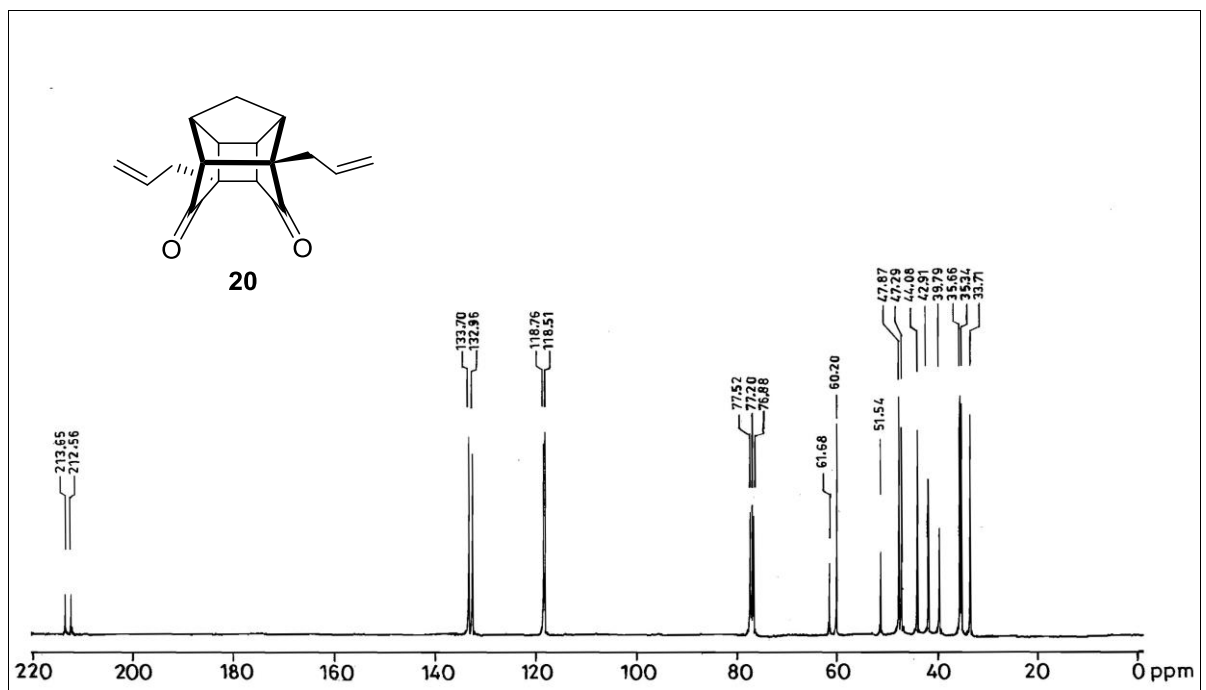

### 3. $^1\text{H}$ and $^{13}\text{C}$ NMR spectra of compound 21

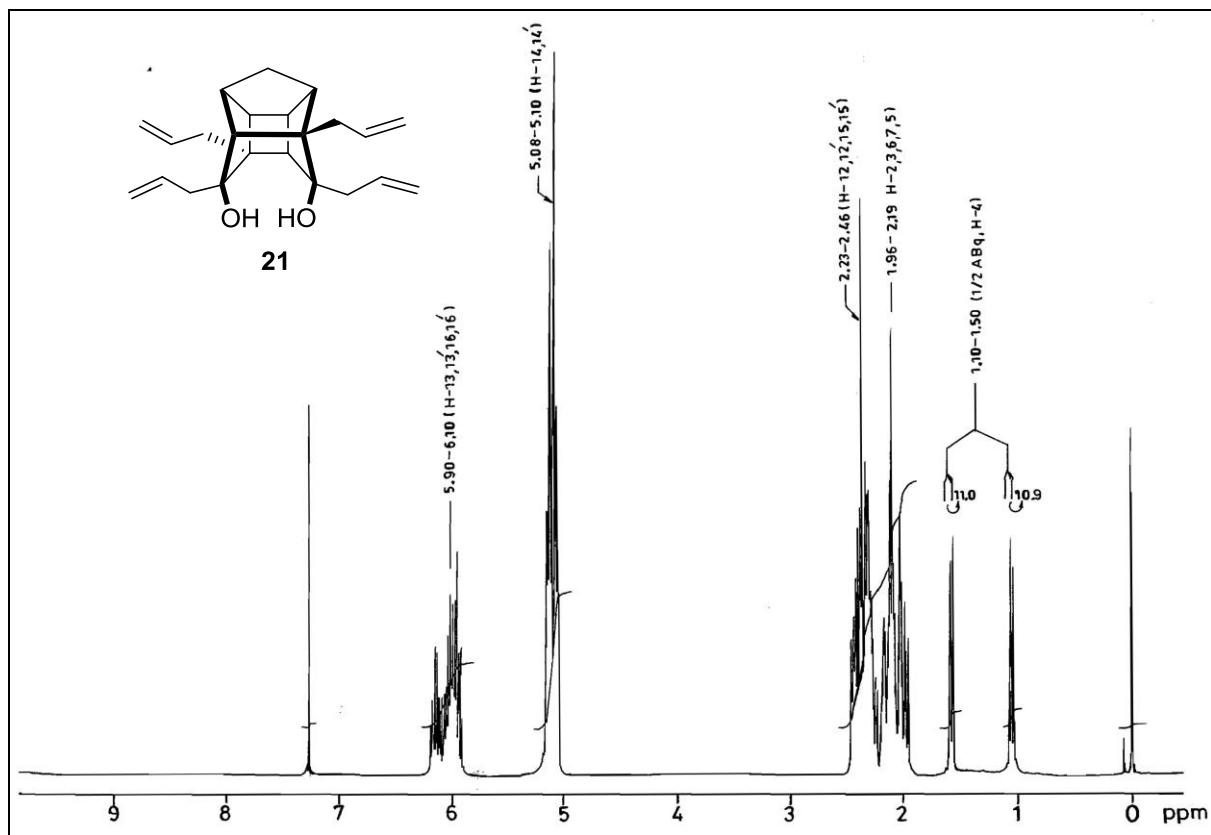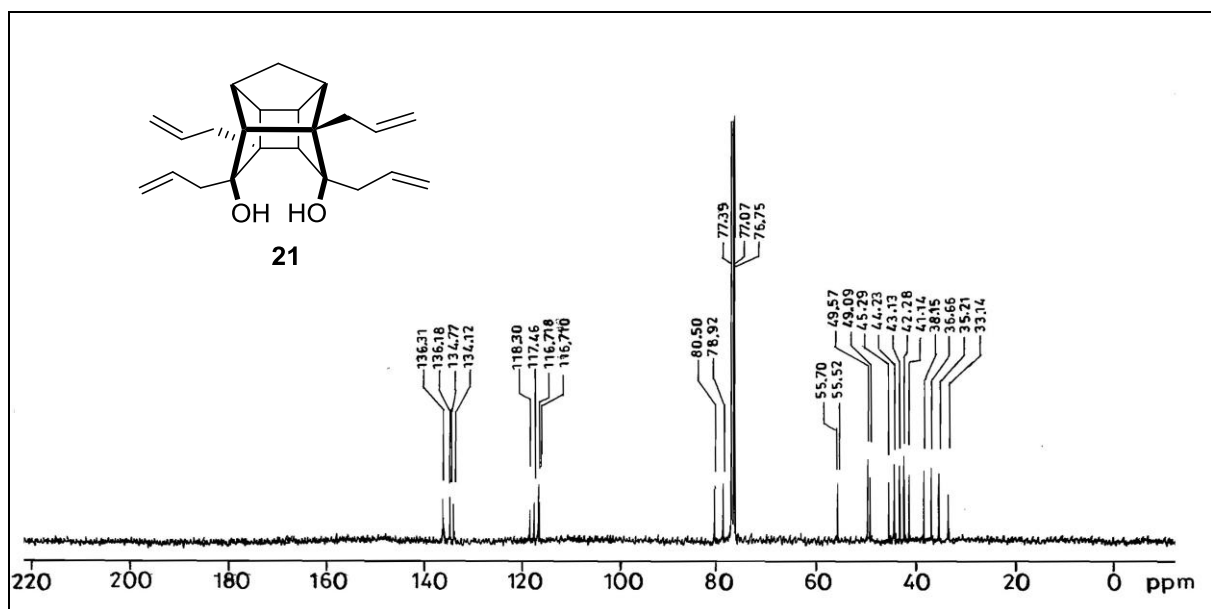

#### 4. $^1\text{H}$ and $^{13}\text{C}$ NMR spectra of compound 22

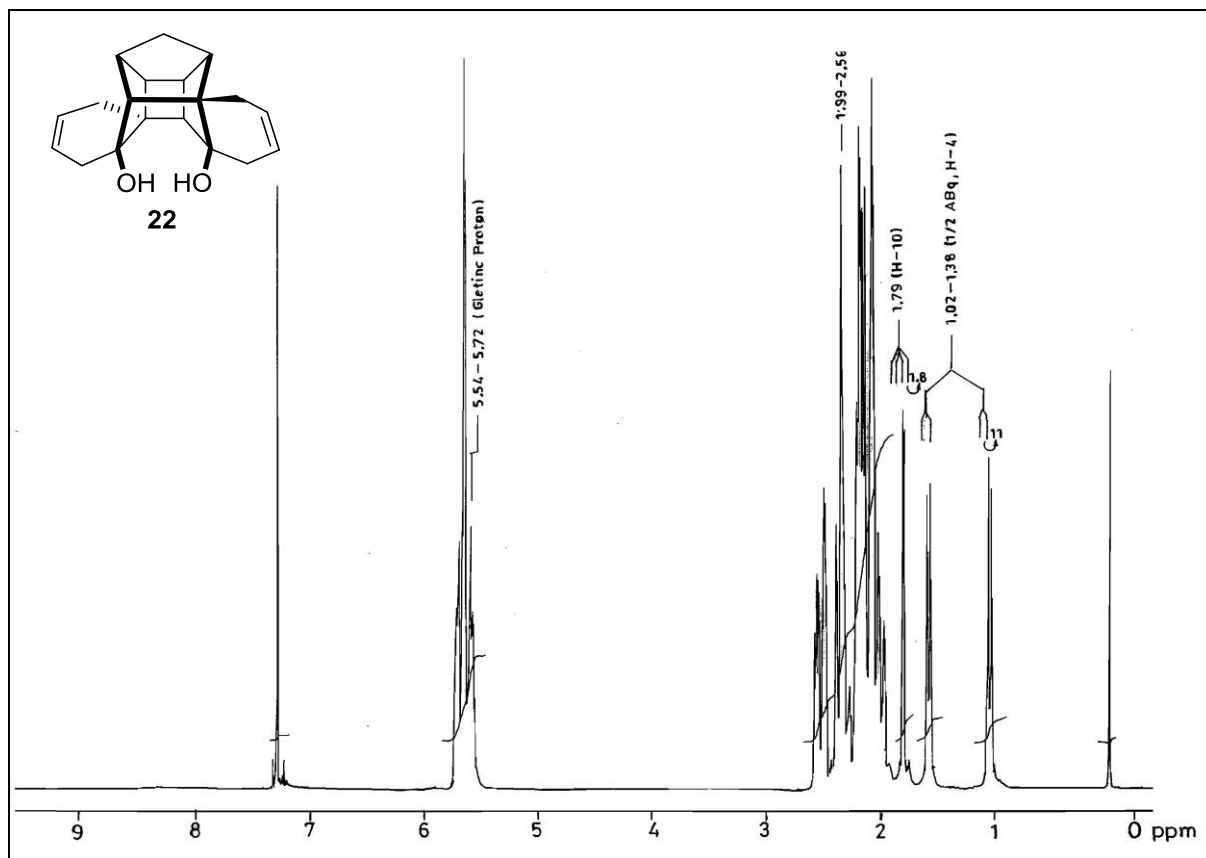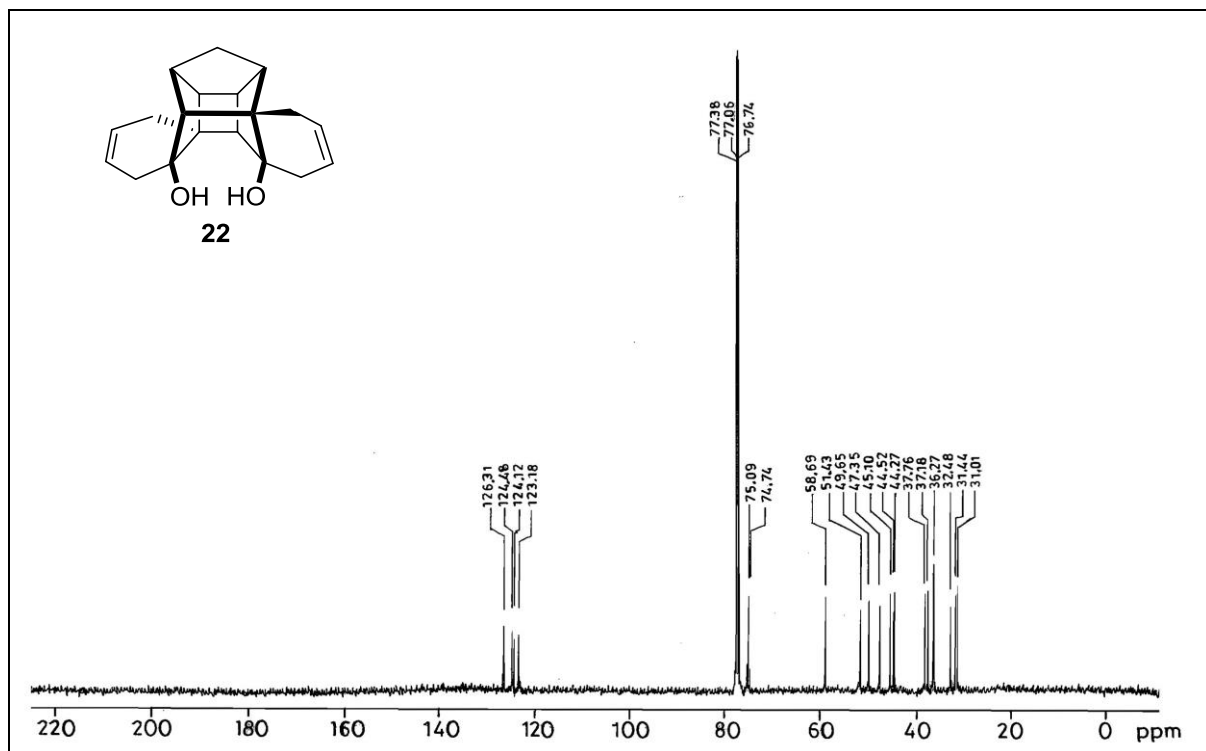

## 5. $^1\text{H}$ and $^{13}\text{C}$ NMR spectra of compound 24

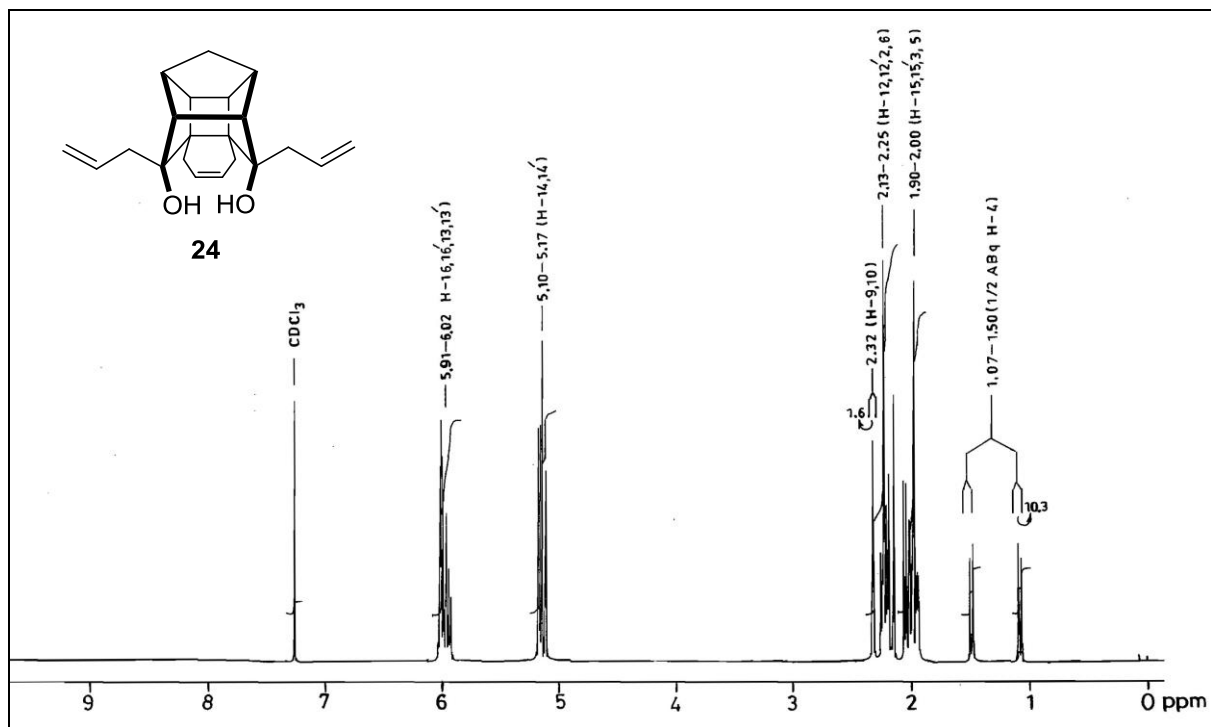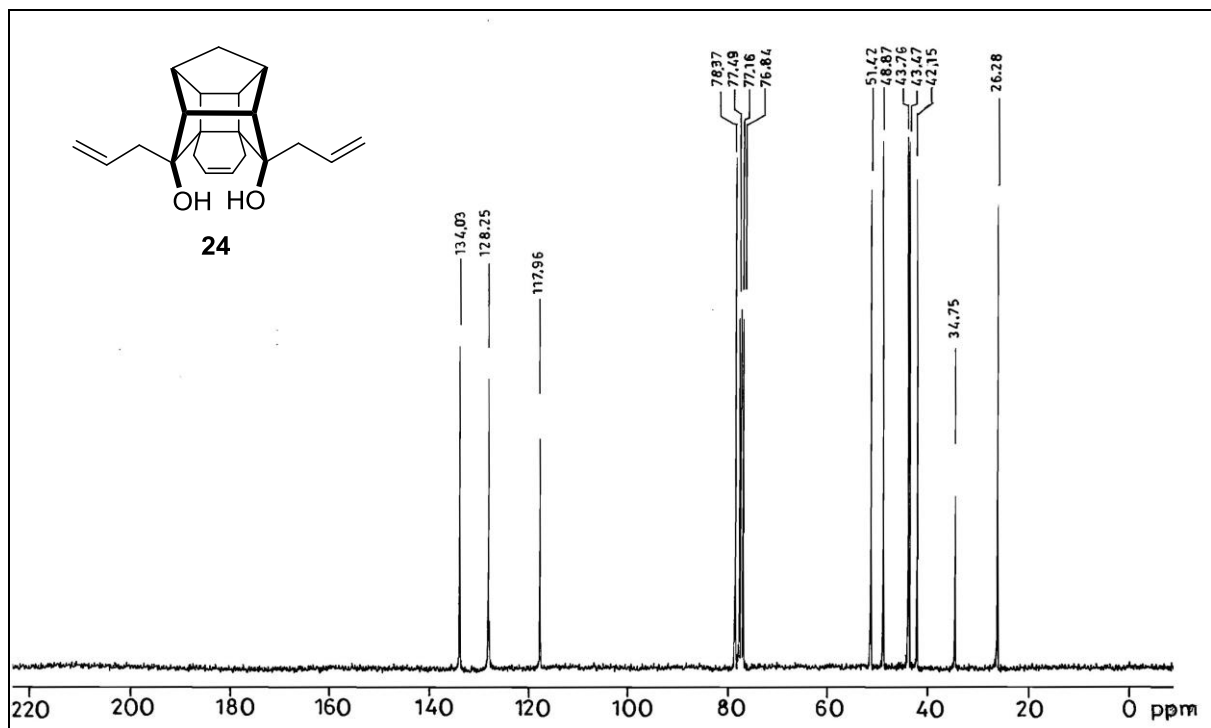

## 6. <sup>1</sup>H and <sup>13</sup>C NMR spectra of compound 26

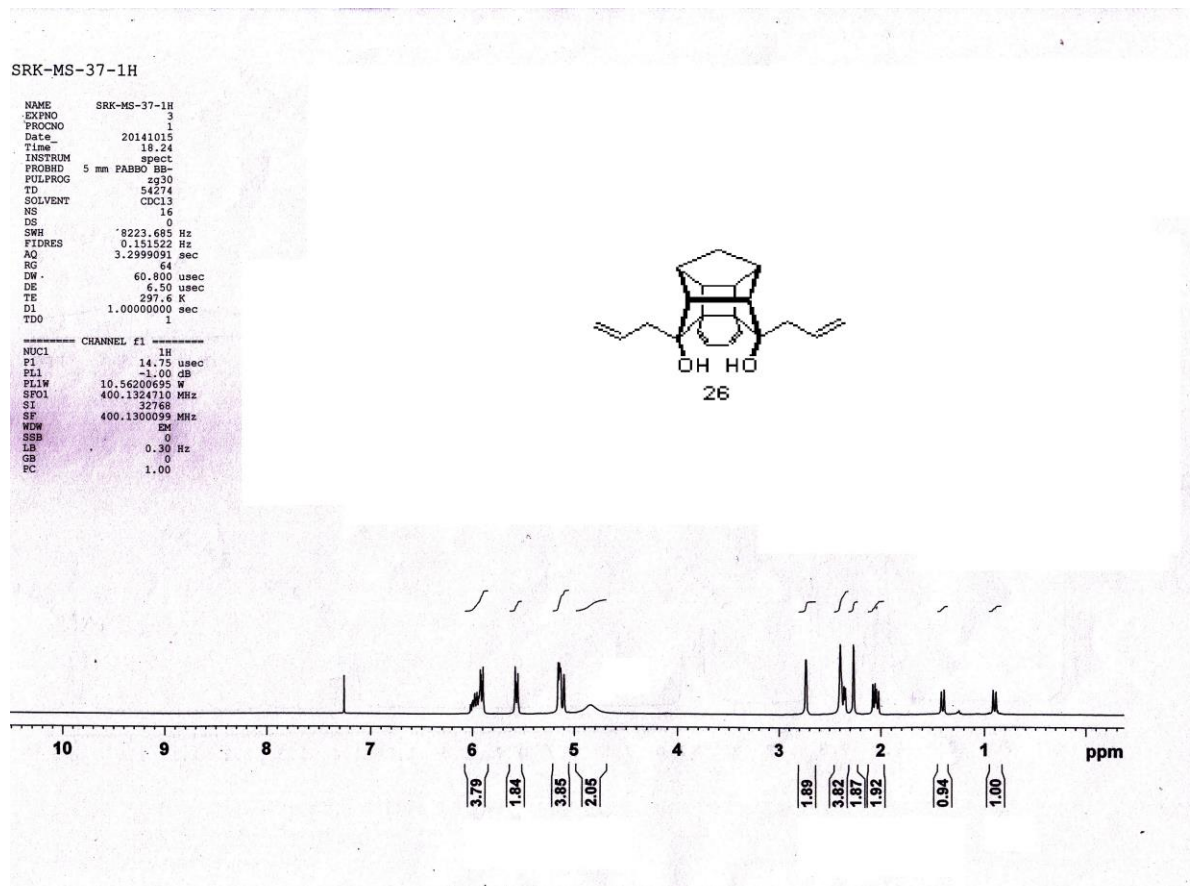

133.70  
124.40  
124.32  
118.24

78.80  
77.52  
77.20  
76.88

54.17  
51.31  
48.63  
44.02  
42.14  
31.73

NAME SRK-MS-37-13C  
EXPRD 3  
PROCNO 1  
Date\_ 20141015  
Time 18.33  
INSTRUM spect  
PROBHD 5 mm PABBO BB-  
PULPROG zgpg30  
TD 65536  
SOLVENT CDCl3  
NS 95  
DS 4  
SWH 26041.666 Hz  
FIDRES 0.397364 Hz  
AQ 1.2583412 sec  
RG 2050  
DW 19.200 usec  
DE 6.50 usec  
TE 298.3 K  
D1 1.0000000 sec  
D11 0.0300000 sec  
TDO 1

----- CHANNEL f1 -----  
NUC1 13C  
P1 8.50 usec  
PL1 -2.00 dB  
PL1W 56.5312198 W  
SFO1 100.6238364 MHz  
----- CHANNEL f2 -----  
CPDPRG2 waltz16  
NUC2 1H  
PCPD2 80.00 usec  
PL2 -1.00 dB  
PL2 13.69 dB  
PL13 14.50 dB  
PL2W 10.5620695 W  
PL12W 0.35871249 W  
PL19W 0.29767781 W  
SFO2 400.1316005 MHz  
SI 32768  
SF 400.1316005 MHz  
WDW EM  
SSB 0  
LB 1.00 Hz  
GB 0  
PC 1.40

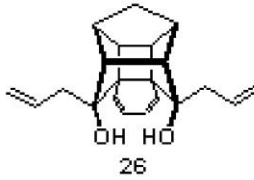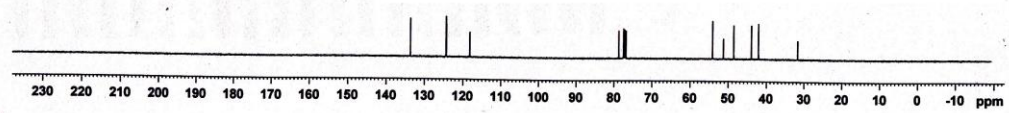

Supplement: Additional file 1 [file 1860-5397-10-280-S1.pdf]
